# Supplementary material
Source: MDPI journal article supplement (https://www.mdpi.com/2076-3417/11/12/5544)
Supplement: s1 [file s1]

Supplementary Materials

# Microbots Gene Delivery System Based on Bifidobacteria in a Tumor Model

Luis D. Terrazas Armendáriz, Itza E. Luna Cruz, Cynthia A. Alvizo Báez, Azael A. Cavazos Jaramillo, Cristina Rodríguez Padilla, Reyes S. Tamez-Guerra, and Juan M. Alcocer González \*.

Laboratory of Immunology and Virology, Biological Sciences Faculty, University Autonomus of Nuevo León, San Nicolás de los Garza, Avenida Pedro de Alba, San Nicolás de los Garza, Nuevo León 66450, México; luis.terrazasarmn@uanl.edu.mx (L.D.T.A.); itza.lunacruz@uanl.edu.mx (I.E.L.C.); cynthia.alvizobz@uanl.edu.mx (C.A.A.B.); azael.cavazosjrm@uanl.edu.mx (A.A.C.J.); crrodrig07@gmail.com (C.R.P.); rtamez1804@yahoo.com.mx (R.S.T.-G.)  
\* Correspondence: juan.alcocerg@uanl.mx; Tel.: +5283294000 (ext. 4290)

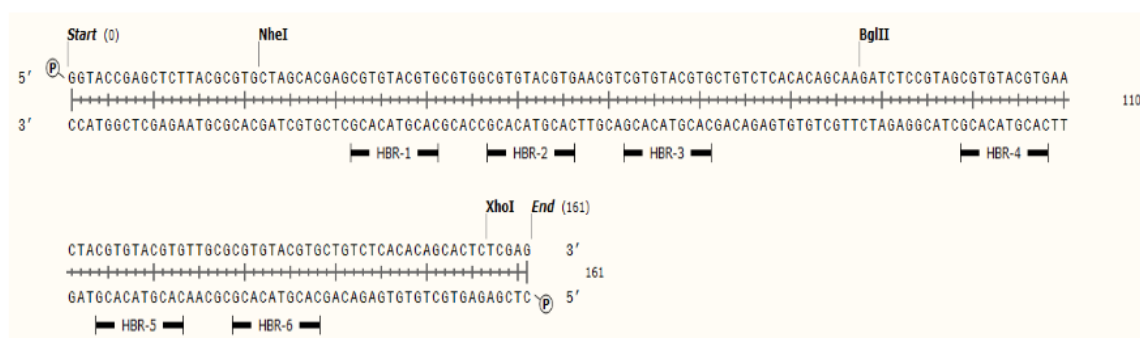

**Supplementary Figure S1. Tandem sequence repetitions of 6HRE.**

Consensus sequences of a hypoxia response element, based on sequences reported from the consensus binding sites of HIF1 $\alpha$  (5'-CGTG-3') and HIF2 $\alpha$  (5'-TRCGGTG3') of the EPO and vascular endothelial growth factor (VEGF) genes, this sequence represents the binding sites of HIF1 $\alpha$  and HIF2 $\alpha$  together in a single site binding unit (CGTGTACGTG). Created with Snap Gene.

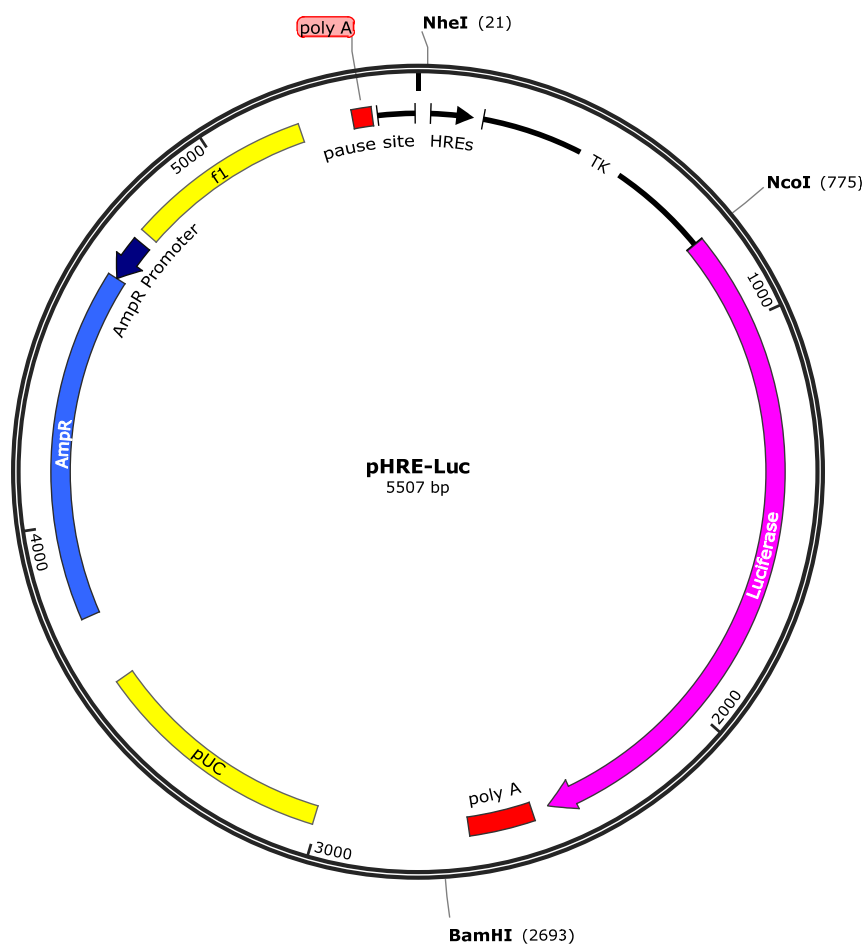

**Supplementary Figure S2. The pHRE-LUC vector map.**

The pRE-Luc plasmid contains 6 repetitions of HRE (CGTGTACGTG), the human thymidine kinase promoter region, a gene reporter coding for firefly luciferase, a cloning site and ampicillin resistance gene. Created with SnapGene

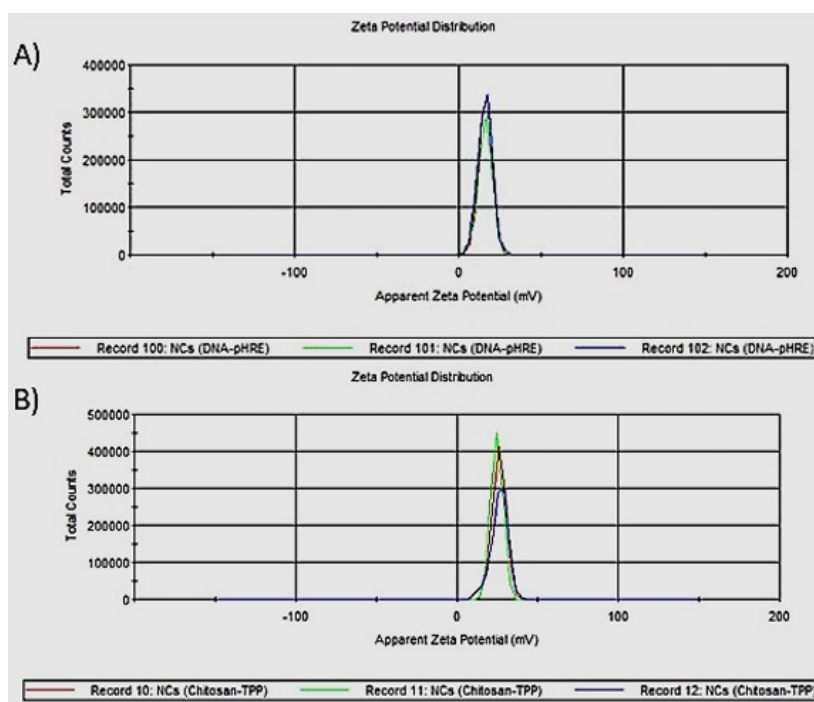

**Supplementary Figure S3. Zeta potential of NCs with and without pHRE-Luc.**

**Figure 1. Size and zeta potential distribution of NCs.** A) Hydrodynamic zeta potential of NCs- pHRE-Luc, with a potential of +16 mV intensity =100%, St Dev =3.99.

B) Hydrodynamic zeta potential of NCs without pHRE-Luc with a potential of +25 mV intensity =100%, St Dev =3.99. NCs are composed of FMNPs, chitosan, TPP and pHRE-Luc. Results obtained were from three measurements.

**Abbreviations:** NCs, nanocomplexes; FMNPs, fluorescent magnetic nanoparticles; TPP, sodium tripolyphosphate; pHRE-Luc, hypoxia inducible plasmid-DNA.
